# Supplementary material for: Widely Targeted Metabolomics Analysis Reveals Key Quality-Related Metabolites in Kernels of Sweet Corn
Source: Hindawi journal article supplement (doi:10.1155/2021/2654546), 2021-02-08
Supplement: f1 [file 2654546.f1.pdf]

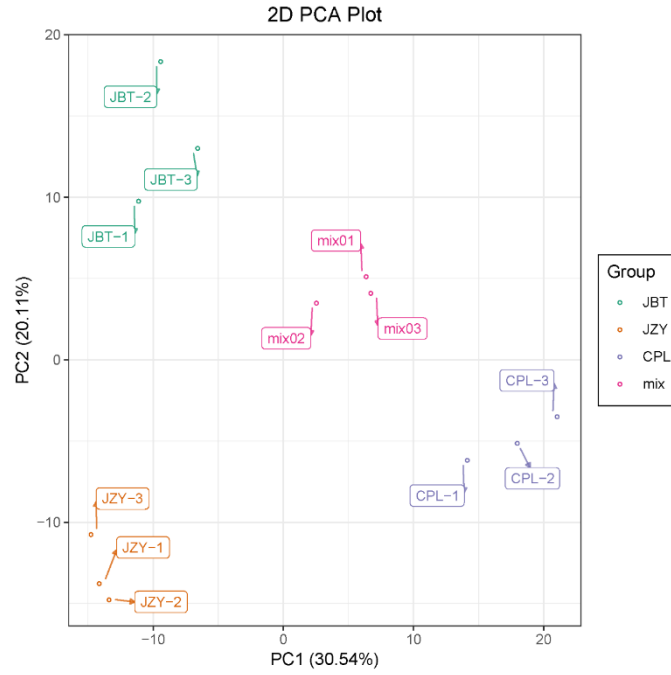

**Figure S1:** Metabolite distribution by PCA analysis in sweet corn cultivars. A clear distinction can be observed among the three cultivars. The three dots in each group are representative of the pooled samples performed for this study. In total, 30 biological replications were performed per cultivar, every ten of which were pooled to give one pooled sample. Mix is the mixture of JZY, JBT and CPL.

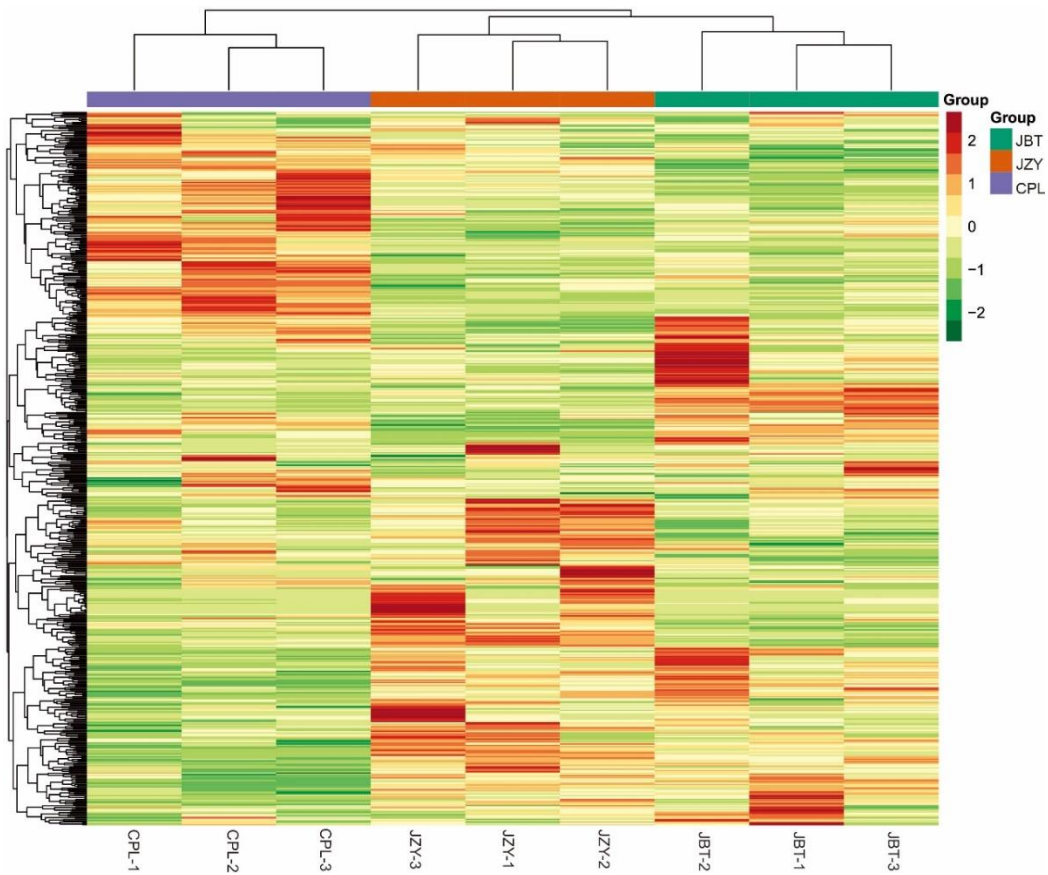

**Figure S2.** HCA analysis of sweetcorn kernels from the three accessions.

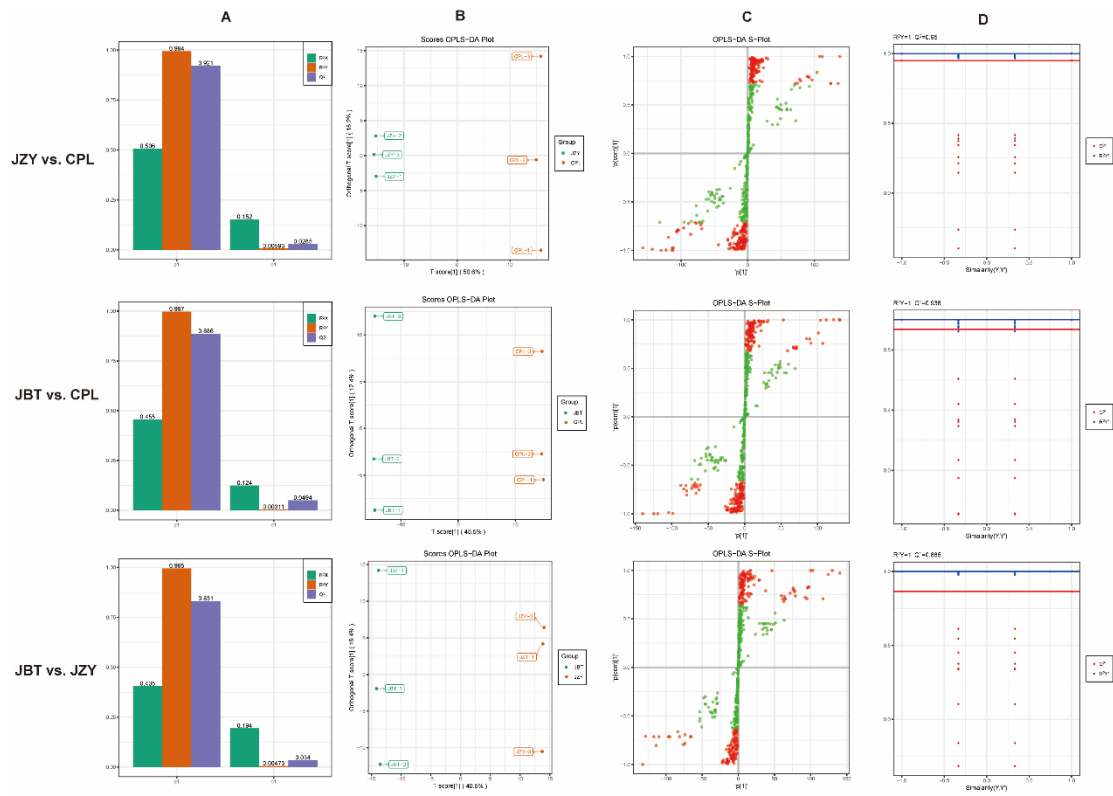

**Figure S3.** OPLS-DA analysis of sweetcorn kernels from the three accessions in pairs.

(A), OPLS-DA model; (B), OPLS-DA scores plot, the three dots in each group are representative of the pooled samples performed for this study. In total, 30 biological replications were performed per cultivar, every ten of which were pooled to give one pooled sample; (C), OPLS-DA S-plot, red dots indicate the distinctive compounds ( $VIP \geq 1$ ); (D), OPLS-DA permutation test ( $n=200$ ), the horizontal lines indicate  $R^2Y$  and  $Q^2$  in the original model, red dot and blue dot represent  $R^2Y'$  and  $Q^2'$  of the model after Y replacement, respectively. All  $R^2Y'$  dots are below the original  $R^2Y$  line, and all  $Q^2'$  dots are below the original  $Q^2$  line, indicating the OPLS-DA model is validate and suitable.

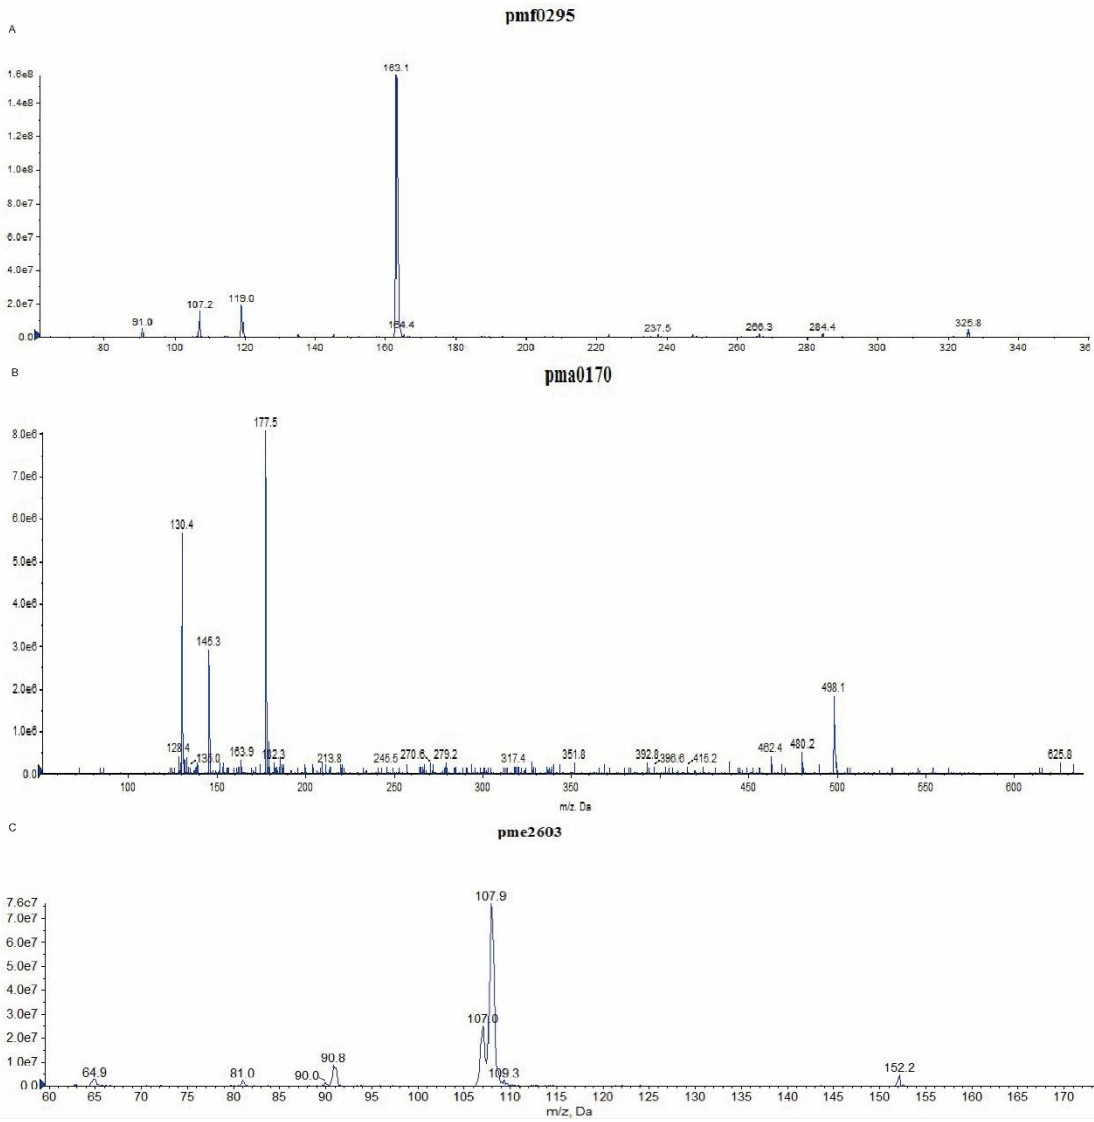

**Figure S4.** Mass spectrum of potential metabolite markers related to grain quality traits in sweet corn. (A), skimmin; (B), *N,N'*-diferuloylspermidine; (C), 3-hydroxyanthranilic acid.

Table S1. The gradient program for HPLC analysis in various sweet corn kernels.

|                  | Time<br>(min) | Flow rate<br>(mL/min) | % A | % B |
|------------------|---------------|-----------------------|-----|-----|
| Gradient program | 0.0           | 0.4                   | 95  | 5   |
|                  | 11.0          | 0.4                   | 5   | 95  |
|                  | 12.0          | 0.4                   | 5   | 95  |
|                  | 12.1          | 0.4                   | 95  | 5   |
|                  | 15.0          | 0.4                   | 95  | 5   |

Table S2. A list of differential metabolites in kernels among the three sweet corn cultivars using UPLC-QTRAP-MS/MS ( $Q^2 > 0.5$  in PLS-DA plot).

| Class                      | Rt (min) | Q1 (Da) | Q3 (Da) | Molecular Weight (Da) | Ionization model | Compounds                                              | JBT vs. JZY      |                     | JBT vs. CPL |        | JZY vs. CPL |        |
|----------------------------|----------|---------|---------|-----------------------|------------------|--------------------------------------------------------|------------------|---------------------|-------------|--------|-------------|--------|
|                            |          |         |         |                       |                  |                                                        | VIP <sup>a</sup> | Log2FC <sup>b</sup> | VIP         | Log2FC | VIP         | Log2FC |
| Alcohols                   | 0.76     | 204     | 102     | 205                   | [M-H]-           | Pantothenol                                            | 1.16             | -0.71               | 1.31        | -1.35  | 1.14        | -0.64  |
|                            | 0.77     | 151     | 71      | 152                   | [M-H]-           | D-Arabitol                                             | 0.4              | 0.23                | 1.23        | 1.14   | 1.12        | 0.91   |
|                            | 0.77     | 169     | 134     | 168                   | [M+H]+           | 4-(Aminomethyl)-5-(hydroxymethyl)-2-methylpyridin-3-ol | 1.4              | -0.59               | 1.42        | -1.59  | 1.25        | -1     |
| Alkaloids                  | 0.79     | 138     | 94      | 137                   | [M+H]+           | Trigonelline                                           | 1.52             | -2.58               | 0.49        | -0.247 | 1.37        | 2.33   |
|                            | 2.68     | 219     | 146     | 218                   | [M+H]+           | Abrine                                                 | 1.05             | -0.43               | 1.37        | -1.04  | 1.32        | -0.61  |
|                            | 2.73     | 250     | 147     | 250                   | Protonated       | Coumaroyl choline                                      | 1.55             | -2.66               | 1.09        | -0.929 | 1.18        | 1.73   |
|                            | 3.08     | 310     | 251     | 310                   | Protonated       | Sinapoylcholine                                        | 1.56             | 1.96                | 0.315       | 0.192  | 1.32        | -1.77  |
|                            | 3.39     | 157     | 103     | 156                   | [M+H]+           | 2,3'-Bipyridine                                        | 0.86             | 0.62                | 1.4         | 2.38   | 1.25        | 1.76   |
|                            | 3.79     | 485     | 323     | 484                   | [M+H]+           | N-hexosyl-p-coumaroyl serotonin                        | 0.55             | -0.24               | 1.48        | -13.6  | 1.4         | -13.36 |
|                            | 3.84     | 219     | 174     | 218                   | [M+H]+           | 5-Methoxy-N,N-dimethyltryptamine                       | 1.12             | -11.3               | 0.0434      | -0.621 | 1.01        | 10.68  |
|                            | 4.38     | 162     | 116     | 161                   | [M+H]+           | Indole-3-carboxylic                                    | 1.49             | 2.13                | 1.42        | 2.5    | 0.63        | 0.37   |
|                            | 4.50     | 164     | 149     | 165                   | [M-H]-           | Coixol                                                 | 0.73             | -0.83               | 1.12        | -1.62  | 1.11        | -0.78  |
| 6.09                       | 327      | 171     | 350     | [M]-                  | Acid orange 20   | 1.2                                                    | 0.75             | 0.869               | -0.587      | 1.37   | -1.34       |        |
| Amino acid and derivatives | 0.73     | 175     | 116     | 174                   | [M+H]+           | L-(+)-Arginine                                         | 0.74             | -0.14               | 1.4         | -1.92  | 1.32        | -1.78  |
|                            | 0.75     | 116     | 74      | 117                   | [M-H]-           | Guanidineacetic acid                                   | 1.05             | -0.67               | 1.46        | -2.03  | 1.14        | -1.36  |
|                            | 0.75     | 159     | 88      | 160                   | [M-H]-           | D-Alanyl-D-Alanine                                     | 0.85             | -0.37               | 1.44        | -1.52  | 1.23        | -1.15  |
|                            | 0.76     | 118     | 74      | 119                   | [M-H]-           | L-Threonine                                            | 0.84             | 0.48                | 1.36        | 1.09   | 1.08        | 0.61   |
|                            | 0.76     | 147     | 84      | 146                   | [M+H]+           | L-Glutamine                                            | 1.12             | 0.16                | 1.39        | 1.02   | 1.3         | 0.86   |
|                            | 0.77     | 307     | 145     | 308                   | [M-H]-           | L-Glutamine O-hexside                                  | 0.84             | -0.72               | 1.28        | -1.52  | 0.99        | -0.8   |
|                            | 0.77     | 122     | 76      | 121                   | [M+H]+           | L-Cysteine                                             | 0.74             | 0.2                 | 1.24        | 1.22   | 1.13        | 1.01   |
|                            | 0.77     | 399     | 250     | 398                   | [M+H]+           | S-(5'-Adenosyl)-L-methionine                           | 1.12             | -2.08               | 0.67        | -0.712 | 0.47        | 1.37   |
|                            | 0.78     | 147     | 84      | 146                   | [M+H]+           | L-(+)-Lysine                                           | 1.13             | 0.17                | 1.44        | 1      | 1.37        | 0.83   |
|                            | 0.78     | 131     | 114     | 132                   | [M-H]-           | L-Asparagine                                           | 1.39             | -0.74               | 1.42        | -1.62  | 1.29        | -0.88  |
|                            | 0.78     | 133     | 116     | 132                   | [M+H]+           | L(+)-Ornithine                                         | 1.03             | -0.82               | 1.27        | -1.33  | 0.88        | -0.51  |
|                            | 0.78     | 88      | 71      | 89                    | [M-H]-           | L-Alanine                                              | 1.48             | -0.39               | 1.44        | -1.03  | 1.33        | -0.64  |

|      |     |     |     |        |                                                          |              |          |              |              |              |              |
|------|-----|-----|-----|--------|----------------------------------------------------------|--------------|----------|--------------|--------------|--------------|--------------|
| 0.79 | 174 | 131 | 175 | [M-H]- | L-Citrulline                                             | 0.89         | -0.25    | 1.41         | -1.11        | 1.19         | -0.86        |
| 0.79 | 275 | 257 | 276 | [M-H]- | L-Saccharopine                                           | 1.5          | 0.86     | 1.45         | 3.07         | 1.35         | 2.21         |
| 0.80 | 162 | 98  | 161 | [M+H]+ | 2-Amino adipic acid (L-Homoglutamic acid)                | 0.68         | 0.28     | 1.45         | 3.56         | 1.37         | 3.28         |
| 0.80 | 235 | 118 | 234 | [M+H]+ | Lysine butyrate                                          | 1.5          | -1.9     | 1.27         | -1.49        | 0.48         | 0.41         |
| 0.80 | 308 | 146 | 309 | [M-H]- | L-Glutamic acid O-glucoside                              | 1.27         | -1.4     | 0.64         | 0.339        | 1.28         | 1.73         |
| 0.84 | 112 | 95  | 111 | [M+H]+ | Histamine                                                | 0.53         | -0.31    | 1.15         | 1.55         | 1.19         | 1.87         |
| 0.87 | 150 | 61  | 149 | [M+H]+ | DL-Methionine                                            | 1.56         | 0.88     | 1.17         | -0.353       | 1.37         | -1.23        |
| 1.11 | 187 | 125 | 188 | [M-H]- | N $\alpha$ -Acetyl-L-glutamine                           | 0.73508<br>9 | -0.80328 | 1.13523<br>5 | -3.01054     | 0.52395<br>1 | -<br>2.20726 |
| 1.13 | 251 | 84  | 250 | [M+H]+ | $\gamma$ -Glu-Cys                                        | 0.32101<br>6 | 0.076869 | 1.31013<br>9 | 1.19861<br>4 | 1.31909<br>8 | 1.12174<br>5 |
| 1.14 | 187 | 145 | 188 | [M-H]- | N6-Acetyl-L-lysine                                       | 1.47         | -0.99    | 1.1          | 0.269        | 1.36         | 1.26         |
| 1.14 | 217 | 158 | 216 | [M+H]+ | N $\alpha$ -Acetyl-L-arginine                            | 1.46395<br>7 | -0.9678  | 1.39921<br>9 | -1.17645     | 0.76400<br>4 | -<br>0.20866 |
| 1.15 | 150 | 61  | 149 | [M+H]+ | L-Methionine                                             | 1.37         | 0.67     | 1.26         | -0.41        | 1.37         | -1.08        |
| 1.16 | 308 | 233 | 307 | [M+H]+ | Glutathione reduced form                                 | 1            | 0.4      | 1.25         | 1.13         | 1.05         | 0.74         |
| 1.16 | 128 | 82  | 129 | [M-H]- | L-Pipecolic acid                                         | 0.82         | -0.3     | 1.39         | -1.05        | 1.23         | -0.75        |
| 1.16 | 217 | 199 | 218 | [M-H]- | (5-L-Glutamyl)-L-amino acid                              | 1.09         | -1.44    | 0.824        | -0.527       | 0.95         | 0.91         |
| 1.18 | 188 | 128 | 189 | [M-H]- | N-Acetyl-L-glutamic acid                                 | 0.22         | 0.06     | 1.39         | -1.6         | 1.32         | -1.66        |
| 1.26 | 132 | 86  | 131 | [M+H]+ | L-Isoleucine                                             | 1.02         | -0.24    | 1.41         | 0.785        | 1.36         | 1.02         |
| 1.26 | 138 | 103 | 137 | [M+H]+ | L-Tyramine                                               | 1.31         | -0.93    | 1.32         | 1.5          | 1.33         | 2.43         |
| 1.27 | 174 | 88  | 175 | [M-H]- | N-Acetylaspartate                                        | 0.69         | -10.46   | 1.04         | 1.6          | 1.41         | 12.06        |
| 1.29 | 132 | 57  | 131 | [M+H]+ | N-Propionylglycine                                       | 1.09         | -0.23    | 1.4          | 0.799        | 1.38         | 1.02         |
| 1.35 | 132 | 86  | 131 | [M+H]+ | alpha-Aminocaproic acid                                  | 1.01         | -0.27    | 1.4          | 0.757        | 1.36         | 1.02         |
| 1.44 | 162 | 73  | 161 | [M+H]+ | S-Allyl-L-cysteine                                       | 0.8          | 2.96     | 1.1          | -2.53        | 1.11         | -5.49        |
| 1.45 | 212 | 166 | 211 | [M+H]+ | (-)-3-(3,4-Dihydroxyphenyl)-2-methylalanine              | 0.8          | 0.32     | 1.05         | -1.14        | 1.17         | -1.47        |
| 1.50 | 210 | 135 | 211 | [M-H]- | 3-(6-Hydroxy-3,4-dioxo-1,5-cyclohexadien-1-yl)-L-alanine | 1.19         | -0.41    | 1.46         | -1.24        | 1.27         | -0.83        |
| 1.59 | 161 | 99  | 162 | [M-H]- | 3-Hydroxy-3-methylpentane-1,5-dioic acid                 | 1.18         | -0.59    | 1.15         | 0.623        | 1.36         | 1.21         |
| 1.91 | 216 | 170 | 215 | [M+H]+ | 3-Chloro-L-tyrosine                                      | 1.12         | -14      | 0.457        | -0.291       | 0.64         | 13.71        |

|                                |      |       |       |     |                    |                                                 |      |        |                |        |      |        |
|--------------------------------|------|-------|-------|-----|--------------------|-------------------------------------------------|------|--------|----------------|--------|------|--------|
|                                | 1.92 | 166   | 77    | 165 | [M+H] <sup>+</sup> | D-(+)-Phenylalanine                             | 1.12 | -19.04 | 0.0141         | 0.0969 | 1.01 | 19.14  |
|                                | 1.98 | 237   | 192   | 236 | [M+H] <sup>+</sup> | N <sup>1</sup> -Formylkynurenine                | 1.12 | -2.06  | 0.956          | -0.756 | 0.06 | 1.31   |
|                                | 2.57 | 145   | 101   | 146 | [M-H] <sup>-</sup> | 2,3-dimethylsuccinic acid                       | 1.48 | -1.78  | 1.42           | -2.69  | 0.96 | -0.91  |
|                                | 2.61 | 224   | 136   | 223 | [M+H] <sup>+</sup> | N-Acetyl-L-tyrosine                             | 1.25 | -1.18  | 1.32           | -1.29  | 0.06 | -0.12  |
|                                | 3.51 | 172   | 130   | 173 | [M-H] <sup>-</sup> | N-Acetyl-L-leucine                              | 1.4  | 0.78   | 1.46           | 2.16   | 1.33 | 1.38   |
|                                | 3.62 | 313   | 166   | 312 | [M+H] <sup>+</sup> | Phe-Phe                                         | 1.41 | 1.75   | 0.37           | 0.11   | 1.29 | -1.64  |
|                                | 3.84 | 206   | 147   | 207 | [M-H] <sup>-</sup> | N-Acetyl-L-phenylalanine                        | 1.25 | 3.74   | 0.596          | 2.85   | 0.67 | -0.88  |
|                                | 4.07 | 245   | 88    | 246 | [M-H] <sup>-</sup> | N-(3-Indolylacetyl)-L-alanine                   | 0.69 | -9.93  | 1.05           | 1.72   | 1.41 | 11.65  |
|                                | 7.49 | 302   | 109   | 301 | [M+H] <sup>+</sup> | D-erythro-sphinganine                           | 1.52 | 1.05   | 0.787          | 0.348  | 1.19 | -0.7   |
| Carbohydrates                  | 0.76 | 649   | 145   | 650 | [M-H] <sup>-</sup> | D-(+)-Melezitose O-rhamnoside                   | 0.97 | -0.43  | 1.33           | -1.39  | 1.12 | -0.96  |
|                                | 1.07 | 289   | 97    | 290 | [M-H] <sup>-</sup> | D-Sedoheptuiose 7-phosphate                     | 0.22 | 0.05   | 1.31           | 2.82   | 1.24 | 2.77   |
|                                | 4.07 | 609   | 301   | 610 | [M-H] <sup>-</sup> | Hesperetin 7-O-neohesperidoside (Neohesperidin) | 1.44 | 2.35   | 0.291          | -0.38  | 1.37 | -2.73  |
|                                | 4.08 | 609   | 301   | 610 | [M-H] <sup>-</sup> | Hesperetin 7-rutinoside (Hesperidin)            | 1.45 | 2.14   | 0.522          | -0.451 | 1.31 | -2.59  |
|                                | 4.22 | 433   | 271   | 434 | [M-H] <sup>-</sup> | Naringenin 7-O-glucoside (Prunin)               | 1.53 | 18.46  | - <sup>d</sup> | -      | 1.37 | -18.46 |
|                                | 5.05 | 289   | 153   | 288 | [M+H] <sup>+</sup> | Eriodictyol                                     | 0.28 | -0.12  | 1.46           | -12.5  | 1.4  | -12.39 |
|                                | 5.57 | 271   | 151   | 272 | [M-H] <sup>-</sup> | Naringenin chalcone                             | 1.3  | 8.27   | 0.491          | 1.2    | 1.01 | -7.07  |
|                                | 5.59 | 271   | 151   | 272 | [M-H] <sup>-</sup> | Naringenin <sup>c</sup>                         | 1.51 | 16.74  | 0.671          | 9.52   | 1.11 | -7.23  |
|                                | 5.59 | 271   | 151   | 272 | [M-H] <sup>-</sup> | Butin                                           | 1.3  | 7.98   | 0.0322         | 0.604  | 1.13 | -7.38  |
|                                | 5.66 | 271   | 151   | 272 | [M-H] <sup>-</sup> | 4',5,7-Trihydroxyflavanone                      | 1.29 | 8.02   | 0.0373         | 0.705  | 1.11 | -7.31  |
|                                | 5.75 | 301.1 | 164   | 302 | [M-H] <sup>-</sup> | Hesperetin                                      | 1.26 | 5.35   | 0.669          | -7.71  | 1.37 | -13.07 |
|                                | 5.75 | 301.1 | 151   | 302 | [M-H] <sup>-</sup> | Homoeriodictyol                                 | 1.28 | 5.71   | 0.669          | -7.2   | 1.37 | -12.91 |
| Flavonoids and proanthocyanins | 2.63 | 487   | 163   | 488 | [M-H] <sup>-</sup> | Acacetin O-acetyl hexoside                      | 1.47 | 1.09   | 1.27           | 0.582  | 1.05 | -0.51  |
|                                | 2.78 | 627   | 465   | 626 | [M+H] <sup>+</sup> | 8-C-hexosyl-hesperetin O-hexoside               | 0.86 | 0.19   | 1.42           | 1.18   | 1.33 | 0.98   |
|                                | 2.83 | 771   | 609   | 772 | [M-H] <sup>-</sup> | Luteolin O-hexosyl-O-hexosyl-O-hexoside         | 1.27 | -1.51  | 0.174          | 0.0781 | 0.9  | 1.59   |
|                                | 3.39 | 565   | 433   | 564 | [M+H] <sup>+</sup> | C-hexosyl-apigenin C-pentoside                  | 1.19 | 1.98   | 0.038          | -0.14  | 1.17 | -2.12  |
|                                | 3.72 | 669   | 331   | 668 | [M+H] <sup>+</sup> | Tricin 5-O-feruloylhexoside                     | 1.46 | 2.03   | 0.872          | -0.779 | 1.33 | -2.81  |
|                                | 3.77 | 565   | 499   | 564 | [M+H] <sup>+</sup> | C-pentosyl-C-hexosyl-apigenin                   | 1.14 | 1.92   | 0.519          | -0.481 | 1.14 | -2.4   |
|                                | 3.78 | 433.1 | 283.1 | 432 | [M+H] <sup>+</sup> | Apigenin C-glucoside                            | 1.2  | 3.04   | 1.07           | 2.02   | 0.84 | -1.02  |
|                                | 3.78 | 433.1 | 283   | 432 | [M+H] <sup>+</sup> | Isovitexin                                      | 0.59 | 2.53   | 1.07           | 1.87   | 0.47 | -0.66  |
|                                | 3.84 | 419   | 383   | 418 | [M+H] <sup>+</sup> | O-methylnaringenin C-pentoside                  | 1.24 | -1.05  | 0.623          | -0.313 | 0.67 | 0.74   |
|                                | 3.87 | 609   | 463   | 608 | [M+H] <sup>+</sup> | Chrysoeriol C-hexosyl-O-rhamnoside              | 1.24 | 4.33   | 1.09           | -3.79  | 1.22 | -8.11  |

|      |     |     |     |                    |                                        |              |               |              |              |              |              |
|------|-----|-----|-----|--------------------|----------------------------------------|--------------|---------------|--------------|--------------|--------------|--------------|
| 3.89 | 463 | 313 | 462 | [M+H] <sup>+</sup> | Chrysoeriol 8-C-hexoside               | 1.06         | 4.98          | 1.05         | -11.2        | 1.39         | -16.15       |
| 3.94 | 503 | 341 | 504 | [M-H] <sup>-</sup> | Chrysoeriol O-acetylhexoside           | 0.76         | -0.53         | 1.08         | -2.06        | 1.01         | -1.53        |
| 4.00 | 491 | 329 | 492 | [M-H] <sup>-</sup> | Tricin 5-O-hexoside                    | 0.7          | 0.53          | 0.786        | 1.64         | 1.28         | 1.11         |
| 4.07 | 637 | 329 | 638 | [M-H] <sup>-</sup> | Tricin 5-O-rutinoside                  | 1.43         | -1.36         | 0.931        | 0.691        | 1.32         | 2.05         |
| 4.11 | 527 | 331 | 526 | [M+H] <sup>+</sup> | Tricin 5-O- $\beta$ -guaiacylglycerol  | 1.30951<br>5 | 1.621293<br>5 | 0.75397<br>5 | 0.75021<br>2 | 0.95440<br>8 | -<br>0.87108 |
| 4.30 | 491 | 315 | 492 | [M-H] <sup>-</sup> | Tricin 7-O-hexoside                    | 0.97         | 0.86          | 1.48         | -11.3        | 1.4          | -12.19       |
| 4.56 | 579 | 331 | 578 | [M+H] <sup>+</sup> | Tricin O-malonylhexoside               | 0.09         | 1.1           | 1.04         | -9.87        | 1            | -10.97       |
| 5.23 | 403 | 313 | 404 | [M-H] <sup>-</sup> | Tricin O-glycerol                      | 0.49         | -0.14         | 1.17         | -3.32        | 1.09         | -3.18        |
| 5.48 | 435 | 331 | 434 | [M+H] <sup>+</sup> | Tricin O-phenylformic acid             | 1.1          | 10.57         | 1.04         | 11.6         | 0.08         | 1.08         |
| 5.73 | 329 | 314 | 330 | [M-H] <sup>-</sup> | Tricin                                 | 1.34         | 2.46          | 1.1          | -2.18        | 1.32         | -4.63        |
| 5.76 | 299 | 284 | 300 | [M-H] <sup>-</sup> | Chrysoeriol                            |              |               | 1.05         | 10.9         | 0.99         | 10.87        |
| 6.00 | 523 | 329 | 524 | [M-H] <sup>-</sup> | Tricin O-eudesmic acid                 | 1.19         | 1.69          | 1.12         | -3.28        | 1.17         | -4.97        |
| 3.34 | 563 | 353 | 596 | [M-H] <sup>-</sup> | Schaftoside                            | 1.21         | 1.85          | 0.892        | -0.79        | 1.22         | -2.64        |
| 3.50 | 563 | 353 | 564 | [M-H] <sup>-</sup> | Vicenin-3                              | 1.17         | 1.68          | 0.759        | -0.676       | 1.2          | -2.35        |
| 3.52 | 565 | 409 | 564 | [M+H] <sup>+</sup> | Isoschaftoside                         | 1.08         | 1.45          | 0.808        | -0.719       | 1.17         | -2.17        |
| 3.97 | 449 | 151 | 450 | [M-H] <sup>-</sup> | Astilbin                               | 1.11         | 16.57         | 0.671        | 7.72         | 0.76         | -8.85        |
| 4.00 | 465 | 301 | 464 | [M-H] <sup>-</sup> | Gossypitrin                            | 1.11         | 11.14         | -            | -            | 1            | -11.14       |
| 4.14 | 607 | 299 | 608 | [M-H] <sup>-</sup> | Diosmin                                | 1.39         | 1.07          | 1.07         | 1.1          | 0.09         | 0.04         |
| 4.18 | 479 | 317 | 478 | [M+H] <sup>+</sup> | Isorhamnetin 3-O-glucoside             | 1.57         | 15.82         | 0.671        | 10.7         | 1.14         | -5.09        |
| 4.47 | 179 | 137 | 178 | [M+H] <sup>+</sup> | 5,7-Dihydroxychromone                  | 1.32         | -1.45         | 1.33         | -2.22        | 0.85         | -0.77        |
| 4.92 | 593 | 285 | 594 | [M-H] <sup>-</sup> | Tilioside                              | 1.26         | 1             | 1.23         | -0.653       | 1.3          | -1.65        |
| 5.13 | 303 | 121 | 302 | [M+H] <sup>+</sup> | Herbacetin                             | 1            | 0.37          | 1.32         | -1.03        | 1.28         | -1.4         |
| 3.86 | 463 | 301 | 464 | [M-H] <sup>-</sup> | Quercetin 4'-O-glucoside (Spiraeoside) | 1.11         | 20.6          | 1.48         | -15.9        | 1            | -20.6        |
| 3.86 | 447 | 285 | 448 | [M-H] <sup>-</sup> | Kaempferol 3-O-galactoside (Trifolin)  | 1.23         | -3.37         | 1.2          | -4.16        | 0.04         | -0.78        |
| 3.36 | 417 | 255 | 416 | [M+H] <sup>+</sup> | Daidzein 7-O-glucoside (Daidzin)       | 1.5          | 1             | 1.45         | 2.33         | 1.3          | 1.33         |
| 3.54 | 445 | 283 | 446 | [M-H] <sup>-</sup> | Glycitin                               | 1.25         | -6.19         | 1.06         | -4.65        | 0.12         | 1.54         |
| 2.31 | 155 | 109 | 154 | [M+H] <sup>+</sup> | Protocatechuic acid                    | 1.54         | -1.73         | 0.97         | -0.71        | 1.03         | 1.02         |
| 2.44 | 315 | 153 | 316 | [M-H] <sup>-</sup> | Protocatechuic acid O-glucoside        | 1.56         | -1.79         | 0.639        | -0.286       | 1.22         | 1.51         |
| 3.03 | 139 | 93  | 138 | [M+H] <sup>+</sup> | Protocatechuic aldehyde                | 1.54         | -2.13         | 0.59         | -0.199       | 1.32         | 1.93         |
| 4.80 | 715 | 563 | 716 | [M-H] <sup>-</sup> | Theaflavin                             | 1.01         | -0.47         | 1.26         | 1.16         | 1.29         | 1.63         |
| 2.92 | 577 | 425 | 576 | [M+H] <sup>+</sup> | Procyanidin A3                         | 0.71         | 8.9           | 1.48         | 12.1         | 1.08         | 3.18         |
| 2.61 | 447 | 285 | 448 | [M-H] <sup>-</sup> | Cyanidin 3-O-glucoside (Kuromanin)     | 1.51         | 1.57          | 1.44         | 1.59         | 0.1          | 0.02         |



|                          |      |       |       |                    |                    |                                            |       |        |       |        |       |       |
|--------------------------|------|-------|-------|--------------------|--------------------|--------------------------------------------|-------|--------|-------|--------|-------|-------|
|                          | 2.68 | 449   | 287   | 448                | [M] <sup>+</sup>   | Cyanidin 3-O-galactoside                   | 0.62  | 0.15   | 0.758 | 1.44   | 1.18  | 1.29  |
|                          | 2.92 | 493   | 331   | 493                | Protonated         | Malvidin 3-O-glucoside (Oenin)             | 0.71  | 0.7    | 0.574 | -2.86  | 1.08  | -3.56 |
|                          | 3.03 | 697   | 535   | 697                | Protonated         | Malvidin 3-acetyl-5-diglucoside            | 0.71  | 10.36  | 1.48  | 13.9   | 1.1   | 3.54  |
|                          | 3.54 | 287   | 213   | 287                | Protonated         | Cyanidin                                   | 1.51  | -1.86  | 1.26  | -1.6   | 0.09  | 0.26  |
| Indole derivatives       | 2.85 | 127   | 81    | 126                | [M+H] <sup>+</sup> | Imidazole-4-acetate                        | 1.13  | 2.28   | 1.12  | 3.21   | 1.22  | 0.93  |
|                          | 3.70 | 176   | 91    | 175                | [M+H] <sup>+</sup> | 5-methoxyindole-3-carbaldehyde             | 1.43  | 1.04   | 1.21  | 0.686  | 1.05  | -0.35 |
| Lipids                   | 6.73 | 351   | 147   | 350                | [M+H] <sup>+</sup> | MAG (18:4) isomer1                         | 1.12  | 0.8    | 1.01  | -1.2   | 1     | -2    |
|                          | 6.84 | 538   | 184   | 537                | [M+H] <sup>+</sup> | LysoPC 19:0                                | 1.46  | 1.98   | 1.02  | 0.627  | 1.31  | -1.35 |
|                          | 7.51 | 424   | 227   | 425                | [M-H] <sup>-</sup> | LysoPE 14:0 (2n isomer)                    | 1.2   | 0.66   | 1.1   | -0.688 | 1.32  | -1.35 |
|                          | 7.54 | 309   | 209   | 310                | [M-H] <sup>-</sup> | 13-HpOTrE(r)                               | 0.68  | 1.05   | 0.942 | -0.933 | 1.05  | -1.98 |
|                          | 7.73 | 468   | 184   | 467                | [M+H] <sup>+</sup> | LysoPC 14:0 (2n isomer)                    | 1.47  | 1.24   | 1.34  | 0.851  | 0.96  | -0.39 |
|                          | 7.80 | 351   | 147   | 350                | [M+H] <sup>+</sup> | MAG (18:4) isomer3                         | 1.33  | -2.25  | 1.27  | -2.35  | 0.25  | -0.1  |
|                          | 7.88 | 494   | 184   | 493                | [M+H] <sup>+</sup> | LysoPC 16:1 (2n isomer)                    | 1.51  | 1.95   | 1.38  | 2.03   | 0.06  | 0.08  |
|                          | 8.42 | 293   | 275   | 294                | [M-H] <sup>-</sup> | 9-HOTrE                                    | 0.51  | -0.93  | 0.794 | 1.55   | 1.05  | 2.47  |
|                          | 8.52 | 277   | 93    | 276                | [M+H] <sup>+</sup> | 14,15-Dehydrocrepenynic acid               | 0.75  | 0.35   | 1.06  | -0.779 | 1.28  | -1.13 |
|                          | 8.55 | 494   | 184   | 493                | [M+H] <sup>+</sup> | LysoPC 16:1                                | 1.57  | 2.03   | 1.47  | 1.49   | 1.3   | -0.55 |
|                          | 8.73 | 452.3 | 255.2 | 453                | [M-H] <sup>-</sup> | LysoPE 16:0 (2n isomer)                    | 0.19  | -0.28  | 1.17  | -1.59  | 1.22  | -1.32 |
|                          | 8.74 | 452   | 255.3 | 453                | [M-H] <sup>-</sup> | LysoPE 16:0                                | 0.21  | -0.25  | 1.2   | -1.58  | 1.24  | -1.33 |
|                          | 8.98 | 482   | 314   | 481                | [M+H] <sup>+</sup> | LysoPE 18:0 (2n isomer)                    | 1.2   | 0.38   | 1.23  | -0.999 | 1.26  | -1.38 |
|                          | 9.29 | 297   | 183   | 298                | [M-H] <sup>-</sup> | 1-Eicosanol                                | 1.48  | -1.13  | 1.33  | -1.18  | 0.21  | -0.06 |
|                          | 9.34 | 510   | 184   | 509                | [M+H] <sup>+</sup> | LysoPC 17:0                                | 1.43  | 0.47   | 1.3   | -0.61  | 1.36  | -1.08 |
|                          | 9.90 | 353   | 335   | 352                | [M+H] <sup>+</sup> | MAG (18:3) isomer4                         | 1.44  | -0.9   | 0.45  | 0.196  | 1.22  | 1.1   |
|                          | 9.91 | 524   | 184   | 523                | [M+H] <sup>+</sup> | LysoPC 18:0                                | 0.47  | -0.17  | 1.39  | -1.18  | 1.26  | -1.01 |
| 10.10                    | 353  | 261   | 352   | [M+H] <sup>+</sup> | MAG (18:3) isomer1 | 1.48                                       | -1.09 | 0.0233 | 0     | 1.3    | 1.09  |       |
| 10.50                    | 355  | 263   | 354   | [M+H] <sup>+</sup> | MAG (18:2)         | 0.99                                       | -0.94 | 0.471  | 0.47  | 1.04   | 1.41  |       |
| 10.70                    | 309  | 227   | 310   | [M-H] <sup>-</sup> | cis-Gondoic acid   | 1.1                                        | 1.87  | 0.44   | 0.186 | 0.76   | -1.68 |       |
| Nucleotide and derivates | 0.70 | 333   | 137   | 332                | [M+H] <sup>+</sup> | 2'-Deoxyinosine-5'-monophosphate           | 1.17  | -0.89  | 1.37  | 1.39   | 1.36  | 2.27  |
|                          | 0.82 | 112   | 95    | 111                | [M+H] <sup>+</sup> | Cytosine                                   | 0.65  | 0.22   | 1.22  | 1.31   | 1.19  | 1.09  |
|                          | 0.82 | 322   | 97    | 323                | [M-H] <sup>-</sup> | Cytidine 5'-monophosphate (Cytidylic acid) | 1.23  | 0.64   | 1.15  | 1.28   | 0.65  | 0.64  |

|                               |      |     |     |                    |                    |                                      |              |          |              |               |              |              |
|-------------------------------|------|-----|-----|--------------------|--------------------|--------------------------------------|--------------|----------|--------------|---------------|--------------|--------------|
|                               | 1.16 | 298 | 166 | 297                | [M+H] <sup>+</sup> | N2-methylguanosine                   | 1.22         | -0.77    | 0.759        | 0.332         | 1.31         | 1.1          |
|                               | 1.16 | 228 | 112 | 227                | [M+H] <sup>+</sup> | Deoxycytidine                        | 0.44         | 0.21     | 1.43         | 1.26          | 1.22         | 1.06         |
|                               | 1.17 | 332 | 136 | 331                | [M+H] <sup>+</sup> | 2'-Deoxyadenosine-5'-monophosphate   | 0.55         | 0.13     | 1.36         | -0.922        | 1.39         | -1.06        |
|                               | 1.19 | 242 | 109 | 243                | [M-H] <sup>-</sup> | Cytidine                             | 1.5          | 0.77     | 1.4          | 1.3           | 1.09         | 0.52         |
|                               | 1.19 | 151 | 151 | 152                | [M-H] <sup>-</sup> | Xanthine                             | 1.48         | 0.76     | 1.43         | 1.4           | 1.25         | 0.64         |
|                               | 1.23 | 113 | 70  | 112                | [M+H] <sup>+</sup> | Uracil                               | 0.22         | -0.08    | 1.23         | 1.34          | 1.17         | 1.42         |
|                               | 1.24 | 243 | 110 | 244                | [M-H] <sup>-</sup> | Uridine                              | 0.24         | 0.01     | 1.09         | 1.08          | 1.17         | 1.07         |
|                               | 1.27 | 115 | 98  | 114                | [M+H] <sup>+</sup> | Dihydrouracil                        | 0.71         | 0.77     | 0.799        | 1.79          | 1.03         | 1.02         |
|                               | 1.32 | 150 | 133 | 151                | [M-H] <sup>-</sup> | Guanine                              | 1.39         | -0.76    | 0.967        | 0.51          | 1.29         | 1.27         |
|                               | 1.33 | 346 | 152 | 345                | [M+H] <sup>+</sup> | Guanosine 3',5'-cyclic monophosphate | 1.47         | -0.8     | 1.15         | 0.778         | 1.31         | 1.58         |
|                               | 1.67 | 253 | 137 | 252                | [M+H] <sup>+</sup> | 2'-Deoxyinosine                      | 1.12         | -16.73   | 0.158        | -0.0554       | 0.97         | 16.67        |
|                               | 1.85 | 167 | 150 | 166                | [M+H] <sup>+</sup> | 7-Methylxanthine                     | 1.57         | -15.94   | -            | -             | -            | -            |
|                               | 1.88 | 252 | 136 | 251                | [M+H] <sup>+</sup> | Deoxyadenosine                       | 1.12         | -20.33   | 0.0381       | 0.624         | 1.01         | 20.95        |
|                               | 1.92 | 167 | 121 | 166                | [M+H] <sup>+</sup> | 6-Methylmercaptapurine               | 1.26         | -11.81   | 0.634        | -0.953        | 0.63         | 10.86        |
|                               | 1.94 | 400 | 136 | 399                | [M+H] <sup>+</sup> | Adenosine O-ribose                   | 1.12         | -16.38   | 0.167        | 2.79          | 1.01         | 19.17        |
|                               | 2.18 | 312 | 180 | 311                | [M+H] <sup>+</sup> | 2-(dimethylamino)guanosine           | 0.97         | -0.4     | 1.3          | 1.2           | 1.34         | 1.6          |
|                               | 2.27 | 282 | 150 | 281                | [M+H] <sup>+</sup> | 1-Methyladenosine                    | 0.68         | -0.3     | 1.35         | 1.28          | 1.34         | 1.58         |
|                               | 2.90 | 296 | 134 | 297                | [M-H] <sup>-</sup> | 5'-Deoxy-5'-(methylthio)adenosine    | 1.26         | -0.44    | 1.44         | -1.21         | 1.24         | -0.77        |
| 4.36                          | 336  | 148 | 335 | [M+H] <sup>+</sup> | Riboprine          | 1.33                                 | -1.6         | 0.522    | 0.188        | 1.33          | 1.79         |              |
| Organic acids and derivatives | 0.75 | 145 | 101 | 146                | [M-H] <sup>-</sup> | Methylglutaric acid                  | 0.68         | 0.08     | 1.42         | -1.57         | 1.34         | -1.64        |
|                               | 0.76 | 108 | 64  | 109                | [M-H] <sup>-</sup> | 2-Aminoethanesulfinic acid           | 0.39         | 0.1      | 1.3          | -1.38         | 1.32         | -1.47        |
|                               | 0.79 | 193 | 113 | 194                | [M-H] <sup>-</sup> | D-Galacturonic acid                  | 0.60447<br>5 | 0.270269 | 1.21965      | -0.7713<br>2  | 1.12708<br>2 | -<br>1.04157 |
|                               | 0.84 | 144 | 102 | 145                | [M-H] <sup>-</sup> | 4-Guanidinobutyric acid              | 0.57         | -0.18    | 1.45         | -1.89         | 1.39         | -1.7         |
|                               | 0.86 | 191 | 111 | 192                | [M-H] <sup>-</sup> | Citric acid                          | 0.52         | 0.26     | 1.08         | -2.16         | 1.04         | -2.42        |
|                               | 0.92 | 191 | 85  | 192                | [M-H] <sup>-</sup> | Quinic acid                          | 0.86         | 0.23     | 1.25         | -0.786        | 1.29         | -1.01        |
|                               | 1.03 | 147 | 87  | 148                | [M-H] <sup>-</sup> | Citramalate                          | 0.93         | 0.2      | 1.26         | -1.02         | 1.24         | -1.23        |
|                               | 1.13 | 89  | 71  | 90                 | [M-H] <sup>-</sup> | Oxalic acid                          | 1.03316      | -0.51315 | 1.38309<br>1 | -2.58601<br>3 | 1.30383<br>3 | -<br>2.07286 |
|                               | 1.19 | 115 | 71  | 116                | [M-H] <sup>-</sup> | Fumaric acid                         | 1.01         | 0.25     | 1.21         | 1.02          | 1.05         | 0.77         |
|                               | 1.19 | 89  | 59  | 90                 | [M-H] <sup>-</sup> | 3-Hydroxypropanoic acid              | 0.72         | 0.37     | 1.02         | -0.65         | 1.26         | -1.02        |
|                               | 1.29 | 103 | 59  | 104                | [M-H] <sup>-</sup> | 3-Hydroxybutyrate                    | 0.79         | 0.17     | 1.41         | -0.895        | 1.35         | -1.06        |
|                               | 1.56 | 103 | 57  | 104                | [M-H] <sup>-</sup> | 2-Hydroxybutanoic acid               | 0.49         | -0.17    | 1.44         | -1.48         | 1.38         | -1.31        |

|      |       |       |     |        |                                               |              |          |              |          |              |              |
|------|-------|-------|-----|--------|-----------------------------------------------|--------------|----------|--------------|----------|--------------|--------------|
| 1.56 | 103   | 57    | 104 | [M-H]- | $\alpha$ -Hydroxyisobutyric acid              | 0.26064<br>2 | -0.10891 | 1.42085<br>3 | -1.69068 | 1.35644<br>6 | -<br>1.58178 |
| 2.02 | 331   | 313   | 332 | [M-H]- | Gallic acid O-Hexoside                        | 1.54         | -1.94    | 0.723        | -1.21    | 0.53         | 0.72         |
| 2.10 | 499   | 163   | 500 | [M-H]- | 5-O-p-coumaroyl quinic acid O-hexoside        | 1.43         | 1.73     | 0.726        | 1.29     | 0.62         | -0.44        |
| 2.26 | 359   | 182   | 360 | [M-H]- | Syringic acid O-glucoside                     | 1.43         | -1.23    | 1.33         | -0.864   | 0.96         | 0.37         |
| 2.28 | 341   | 207   | 340 | [M+H]+ | Sinapoyl malate                               | 1.57         | 5.59     | 1.48         | 6.02     | 1.37         | 0.44         |
| 2.30 | 474   | 327   | 473 | [M+H]+ | 10-Formyl-THF                                 | 0.24         | -0.08    | 1.46         | -2.17    | 1.39         | -2.1         |
| 2.35 | 353   | 191   | 354 | [M-H]- | Neochlorogenic acid (5-O-Caffeoylquinic acid) | 1.33         | 1.05     | 0.859        | -0.555   | 1.16         | -1.6         |
| 2.38 | 353.1 | 191.1 | 354 | [M-H]- | 1-O-Caffeoyl quinic acid                      | 1.35         | 1.03     | 0.861        | -0.551   | 1.17         | -1.58        |
| 2.42 | 153   | 109   | 154 | [M-H]- | 2,3-Dihydroxybenzoic acid                     | 1.53         | -1.57    | 1.37         | -0.985   | 1.29         | 0.59         |
| 2.50 | 499   | 163   | 500 | [M-H]- | 3-O-p-coumaroyl quinic acid O-hexoside        | 1.41         | 1.62     | 0.682        | 1.22     | 0.58         | -0.4         |
| 2.50 | 153   | 108   | 154 | [M-H]- | 2,5-dihydroxybenzoic acid (Gentisic acid)     | 1.16         | -1.01    | 1.25         | -1.42    | 0.85         | -0.41        |
| 2.58 | 145   | 101   | 146 | [M-H]- | 2-Methylglutaric acid                         | 1.5          | -1.81    | 1.43         | -2.66    | 0.97         | -0.85        |
| 2.62 | 481   | 319   | 482 | [M-H]- | 5-O-p-coumaroyl shikimic acid O-hexoside      | 1.43         | 1.02     | 1.34         | 1.18     | 0.33         | 0.16         |
| 2.64 | 188   | 144   | 189 | [M-H]- | Kynurenic acid                                | 0.77         | 0.49     | 1.43         | 1.29     | 1.05         | 0.79         |
| 2.66 | 152   | 108   | 153 | [M-H]- | 3-Hydroxyanthranilic acid                     | 1.57         | 12.49    | 1.48         | 14.8     | 1.35         | 2.33         |
| 2.72 | 353   | 191   | 354 | [M-H]- | Chlorogenic acid (3-O-Caffeoylquinic acid)    | 1.26         | 0.95     | 0.932        | -0.653   | 1.16         | -1.61        |
| 2.75 | 175   | 115   | 176 | [M-H]- | 2-Isopropylmalate                             | 0.75         | 0.34     | 1.44         | -1.84    | 1.37         | -2.18        |
| 2.75 | 153   | 109   | 154 | [M-H]- | 2,4-Dihydroxybenzoic acid                     | 1.52         | -1.64    | 1.26         | -0.986   | 1.13         | 0.65         |
| 2.76 | 131   | 85    | 132 | [M-H]- | 5-hydroxyhexanoic acid                        | 0.85         | 0.29     | 1.45         | -1.67    | 1.38         | -1.96        |
| 2.85 | 337   | 173   | 338 | [M-H]- | 1-O-p-Coumaroyl quinic acid                   | 1.19         | 1.47     | 0.913        | -0.816   | 1.16         | -2.29        |
| 2.92 | 353   | 135   | 354 | [M-H]- | Cryptochlorogenic acid                        | 1.43         | 1.71     | 1.25         | 1.09     | 0.8          | -0.62        |
| 3.01 | 369   | 177   | 368 | [M+H]+ | 3-O-Feruloyl quinic acid                      | 1.37         | -1.42    | 1.41         | -2.05    | 0.66         | -0.62        |
| 3.10 | 137   | 93    | 138 | [M-H]- | 4-Hydroxybenzoic acid                         | 1.55         | -1.84    | 0.66         | -0.33    | 1.19         | 1.51         |
| 3.13 | 160   | 114   | 159 | [M+H]+ | DI-2-Aminooctanoic acid                       | 1.36         | -1.24    | 1.31         | -0.727   | 0.86         | 0.51         |
| 3.13 | 515   | 191   | 516 | [M-H]- | Cynarin                                       | 1.51         | 1.85     | 1.46         | 2.67     | 1.32         | 0.81         |
| 3.14 | 137   | 94    | 136 | [M+H]+ | p-Aminobenzoate                               | 0.87         | -2.16    | 1.39         | -1.54    | 0.65         | 0.62         |
| 3.17 | 399   | 207   | 398 | [M+H]+ | O-Sinapoyl quinic acid                        | 1.47         | -1.26    | 1.44         | -2.11    | 1.37         | -0.85        |
| 3.21 | 151   | 107   | 152 | [M-H]- | p-Hydroxyphenyl acetic acid                   | -            | -        | 1.48040      | 14.9691  | 1.40482      | 14.9691      |

|              |      |     |     |        |                     |                                              |       |       |       |        |      |        |
|--------------|------|-----|-----|--------|---------------------|----------------------------------------------|-------|-------|-------|--------|------|--------|
|              |      |     |     |        |                     |                                              |       |       | 6     | 2      | 8    | 2      |
|              | 3.23 | 481 | 319 | 482    | [M-H]-              | 3-O-p-coumaroyl shikimic acid O-hexoside     | 1.18  | 0.74  | 1.19  | 1.06   | 0.71 | 0.32   |
|              | 3.26 | 337 | 163 | 338    | [M-H]-              | 5-O-p-Coumaroylquinic acid                   | 1.08  | 1.31  | 0.846 | -0.719 | 1.1  | -2.02  |
|              | 3.42 | 369 | 177 | 368    | [M+H]+              | 1-O-Feruloyl quinic acid                     | 1.5   | -2.42 | 1.43  | -2.56  | 0.19 | -0.14  |
|              | 3.52 | 131 | 85  | 132    | [M-H]-              | 2-Hydroxyisocaproic acid                     | 0.48  | -0.33 | 1.04  | 0.938  | 1.21 | 1.27   |
|              | 3.72 | 121 | 92  | 122    | [M-H]-              | 4-Hydroxybenzaldehyde                        | 1.55  | 1.53  | 1.46  | 1.48   | 0.31 | -0.04  |
|              | 3.74 | 369 | 163 | 368    | [M+H]+              | Chlorogenic acid methyl ester                | 0.04  | 0.39  | 1.19  | 4.41   | 1.12 | 4.03   |
|              | 3.81 | 321 | 147 | 320    | [M+H]+              | 5-O-p-Coumaroyl shikimic acid                | 0.02  | 0.36  | 1.05  | -14.4  | 1    | -14.77 |
|              | 3.87 | 173 | 111 | 174    | [M-H]-              | Suberic acid                                 | 1.36  | -0.9  | 1.44  | -1.29  | 0.74 | -0.38  |
|              | 3.93 | 319 | 145 | 320    | [M-H]-              | 3-O-p-Coumaroyl shikimic acid                | 0.1   | -0.15 | 1.37  | -3.24  | 1.38 | -3.1   |
|              | 3.95 | 195 | 121 | 196    | [M-H]-              | (3,4-Dimethoxyphenyl) acetic acid            | 0.04  | -0.21 | 1.04  | -10.8  | 0.98 | -10.57 |
|              | 3.98 | 517 | 163 | 516    | [M+H]+              | Isochlorogenic acid B                        | 1.23  | 3.47  | 1.19  | 4.33   | 0.86 | 0.87   |
|              | 4.00 | 151 | 136 | 152    | [M-H]-              | Vanillin                                     | 1.51  | 1.05  | 1.43  | 0.827  | 1.04 | -0.23  |
|              | 4.16 | 153 | 92  | 152    | [M+H]+              | 2-Methoxybenzoic acid                        | 1.32  | -0.93 | 1.42  | -2.73  | 1.32 | -1.8   |
|              | 4.62 | 211 | 137 | 212    | [M-H]-              | Eudesmic acid (3,4,5-trimethoxybenzoic acid) | 1.4   | -1.42 | 0.341 | 0.114  | 1.34 | 1.53   |
| Others       | 0.79 | 106 | 88  | 105    | [M+H]+              | Diethanolamine                               | 1.32  | -0.2  | 1.48  | -14.2  | 1.41 | -14    |
|              | 1.15 | 300 | 97  | 301    | [M-H]-              | N-Acetylglucosamine 1-phosphate              | 0.64  | -0.36 | 1.15  | 1.64   | 1.19 | 2      |
|              | 2.05 | 374 | 198 | 373    | [M+H]+              | DIMBOA glucoside                             | 0.64  | 0.14  | 0.803 | 2.48   | 1.05 | 2.34   |
|              | 3.79 | 503 | 311 | 502    | [M+H]+              | Phellodensin F                               | 1.53  | -2.62 | 1.31  | -1.8   | 0.74 | 0.82   |
| Phenolamides | 0.56 | 146 | 72  | 145    | [M+H]+              | Spermidine                                   | 1.3   | -0.97 | 1.22  | 0.979  | 1.35 | 1.95   |
|              | 0.76 | 103 | 86  | 102    | [M+H]+              | 1,5-Diaminopentane                           | 0.76  | 0.13  | 1.43  | 1.68   | 1.35 | 1.55   |
|              | 2.11 | 439 | 147 | 438    | [M+H]+              | N-(4'-O-glycosyl)-p-coumaroyl agmatine       | 0.69  | 0.66  | 1.13  | 1.24   | 0.77 | 0.58   |
|              | 2.17 | 469 | 177 | 468    | [M+H]+              | N-(4'-O-glycosyl)-feruloyl agmatine          | 0.86  | -0.44 | 1.46  | 2.48   | 1.38 | 2.92   |
|              | 2.29 | 235 | 147 | 234    | [M+H]+              | N-p-Coumaroyl putrescine                     | 1.42  | 3.77  | 0.414 | 0.281  | 1.26 | -3.49  |
|              | 2.29 | 265 | 177 | 264    | [M+H]+              | N-Feruloyl putrescine                        | 1.48  | 2.61  | 1.29  | 1.56   | 1.27 | -1.06  |
|              | 2.38 | 235 | 147 | 234    | [M+H]+              | N'-p-Coumaroyl putrescine                    | 1.41  | 3.72  | 0.329 | 0.253  | 1.25 | -3.47  |
|              | 2.77 | 295 | 207 | 294    | [M+H]+              | N-Sinapoyl putrescine                        | 1.45  | 1.97  | 1.45  | 2.88   | 1.13 | 0.9    |
|              | 2.87 | 321 | 177 | 320    | [M+H]+              | N-Feruloyl spermidine                        | 1.42  | 2.04  | 1.21  | 1.34   | 1    | -0.7   |
|              | 2.95 | 309 | 207 | 308    | [M+H]+              | N-sinapoyl cadaverine                        | 0.56  | -1.72 | 0.842 | 2.22   | 1.11 | 3.94   |
|              | 3.82 | 498 | 177 | 497    | [M+H]+              | N', N''-Diferuloylspermidine                 | 1.5   | 1.15  | 1.46  | 2.22   | 1.35 | 1.07   |
| 4.91         | 314  | 177 | 313 | [M+H]+ | N-Feruloyl tyramine | 0.53                                         | -0.11 | 1.08  | 2.88  | 1.04   | 2.99 |        |

|                          |       |     |     |        |            |                                                 |      |       |       |         |       |       |
|--------------------------|-------|-----|-----|--------|------------|-------------------------------------------------|------|-------|-------|---------|-------|-------|
| Phenylpropanoids         | 2.39  | 351 | 105 | 352    | [M-H]-     | 6,7-dihydroxycoumarin 7-O-quinic acid           | 1.05 | 0.85  | 1.03  | -1.02   | 1.15  | -1.86 |
|                          | 2.58  | 371 | 209 | 372    | [M-H]-     | Syringin                                        | 1.43 | 0.65  | 1.41  | 1.31    | 1.29  | 0.66  |
|                          | 2.72  | 339 | 177 | 340    | [M-H]-     | Esculin (6,7-Dihydroxycoumarin-6-glucoside)     | 1.34 | 0.72  | 1.46  | 1.45    | 1.24  | 0.73  |
|                          | 2.83  | 325 | 163 | 324    | [M+H]+     | Skimmin                                         | 1.52 | 1.59  | 1.47  | 3.67    | 1.35  | 2.09  |
|                          | 2.86  | 341 | 135 | 342    | [M-H]-     | Caffeic acid O-glucoside                        | 1.29 | 0.7   | 1.33  | 1.05    | 1.03  | 0.35  |
|                          | 3.23  | 179 | 135 | 180    | [M-H]-     | Caffeate                                        | 1.37 | -1.58 | 1.04  | -0.97   | 0.92  | 0.61  |
|                          | 3.31  | 207 | 85  | 206    | [M+H]+     | 6-Hydroxymethylherniarin                        | 1.28 | 0.42  | 1.43  | -1.69   | 1.38  | -2.11 |
|                          | 3.31  | 785 | 623 | 786    | [M-H]-     | Echinacoside                                    | 1.2  | -1.05 | 0.848 | -0.39   | 0.95  | 0.66  |
|                          | 3.35  | 169 | 65  | 168    | [M+H]+     | Vanillic acid                                   | 1.52 | -0.82 | 1.43  | -1.07   | 0.86  | -0.25 |
|                          | 3.39  | 741 | 579 | 742    | [M-H]-     | Eleutheroside E                                 | 0.49 | -0.96 | 0.721 | 0.96    | 1.02  | 1.92  |
|                          | 3.67  | 149 | 131 | 150    | [M-H]-     | p-Coumaryl alcohol                              | 1.4  | 1.54  | 0.865 | -0.694  | 1.37  | -2.24 |
|                          | 3.82  | 369 | 207 | 368    | [M+H]+     | N-sinapoyl hydroxycoumarin                      | 0.47 | 0.11  | 1.41  | -2.29   | 1.36  | -2.4  |
|                          | 3.88  | 339 | 177 | 338    | [M+H]+     | O-Feruloyl 4-hydroxycoumarin                    | 1.02 | 0.78  | 0.93  | -0.375  | 1.12  | -1.15 |
|                          | 3.88  | 209 | 179 | 210    | [M-H]-     | Sinapyl alcohol                                 | 0.6  | -2.49 | 0.681 | 0.735   | 1.07  | 3.23  |
|                          | 4.01  | 623 | 161 | 624    | [M-H]-     | Verbascoside                                    | 0.08 | 1.14  | 1.28  | 6.47    | 1.17  | 5.32  |
|                          | 4.06  | 225 | 147 | 224    | [M+H]+     | Sinapic acid                                    | 0.55 | 0.32  | 1.17  | -0.795  | 1.15  | -1.12 |
|                          | 4.95  | 591 | 367 | 592    | [M-H]-     | Disinapoyl hexoside                             | 1.47 | 1.23  | 1.25  | -1.52   | 1.32  | -2.76 |
|                          | 5.63  | 147 | 119 | 148    | [M-H]-     | 3,4-Dihydrocoumarin                             | 1.15 | 2.09  | 1.01  | 1.06    | 1.22  | -1.02 |
| 8.45                     | 355   | 103 | 354 | [M+H]+ | Notopterol | 0.53                                            | 0.34 | 1.05  | -1.92 | 1.01    | -2.26 |       |
| Terpenes and steroids    | 3.26  | 379 | 199 | 356    | [M+H]+     | Gentiopicroside                                 | 1.16 | 2.19  | 1.12  | 3.13    | 1.26  | 0.94  |
|                          | 3.33  | 359 | 197 | 358    | [M+H]+     | Sweroside                                       | 0.69 | 0.33  | 1.21  | -1.36   | 1.33  | -1.69 |
|                          | 5.14  | 425 | 305 | 424    | [M+H]+     | Ginkgolide B                                    | 1.57 | 12.09 | 1.48  | 12.8    | 0.93  | 0.71  |
|                          | 7.34  | 317 | 137 | 316    | [M+H]+     | Phytocassane D                                  | 1.16 | 2.26  | 0.501 | 1.11    | 0.72  | -1.15 |
|                          | 7.62  | 779 | 617 | 780    | [M-H]-     | Saikosaponin d                                  | 1.34 | -1.24 | 0.604 | -0.377  | 0.96  | 0.86  |
|                          | 11.10 | 455 | 407 | 456    | [M-H]-     | Oleanolic acid                                  | 0.93 | -0.71 | 1.33  | -1.83   | 1.26  | -1.12 |
| Vitamins and derivatives | 0.85  | 175 | 87  | 176    | [M-H]-     | L-ascorbate                                     | 1.44 | 1.53  | 0.193 | -0.161  | 1.39  | -1.69 |
|                          | 1.16  | 332 | 314 | 331    | [M+H]+     | Pyridoxine O-glucoside                          | 1.44 | -1.13 | 0.228 | -0.0849 | 1.35  | 1.04  |
|                          | 1.16  | 170 | 134 | 169    | [M+H]+     | Pyridoxine                                      | 1    | -0.5  | 1.29  | -1.08   | 1.24  | -0.58 |
|                          | 3.26  | 377 | 243 | 376    | [M+H]+     | Riboflavin                                      | 0.03 | 0.01  | 1.4   | 1.15    | 1.33  | 1.15  |
|                          | 3.73  | 138 | 78  | 137    | [M+H]+     | Nicotinic Acid Methyl Ester (Methyl Nicotinate) | 1.5  | 0.66  | 1.37  | 1.33    | 1.08  | 0.67  |

<sup>a</sup> VIP, the variable importance in projection score;

<sup>b</sup> LogFC,  $\log_2(\text{fold change})$ ;

<sup>c</sup> The isomers were shown in blue;

<sup>d</sup> -, the compound was not detected in the related samples.
